# Supplementary material for: MIR29A Impedes Metastatic Behaviors in Hepatocellular Carcinoma via Targeting LOX, LOXL2, and VEGFA
Source: MDPI journal article supplement (doi:10.3390/ijms22116001), 2021-06-01
Supplement: s1 [file s1]

MIR29A impedes metastatic behaviors in hepatocellular carcinoma via targeting, LOX, LOXL2, and VEGFA

- Supplementary Figure S1.....page s1
- Supplementary Figure S2.....page s2

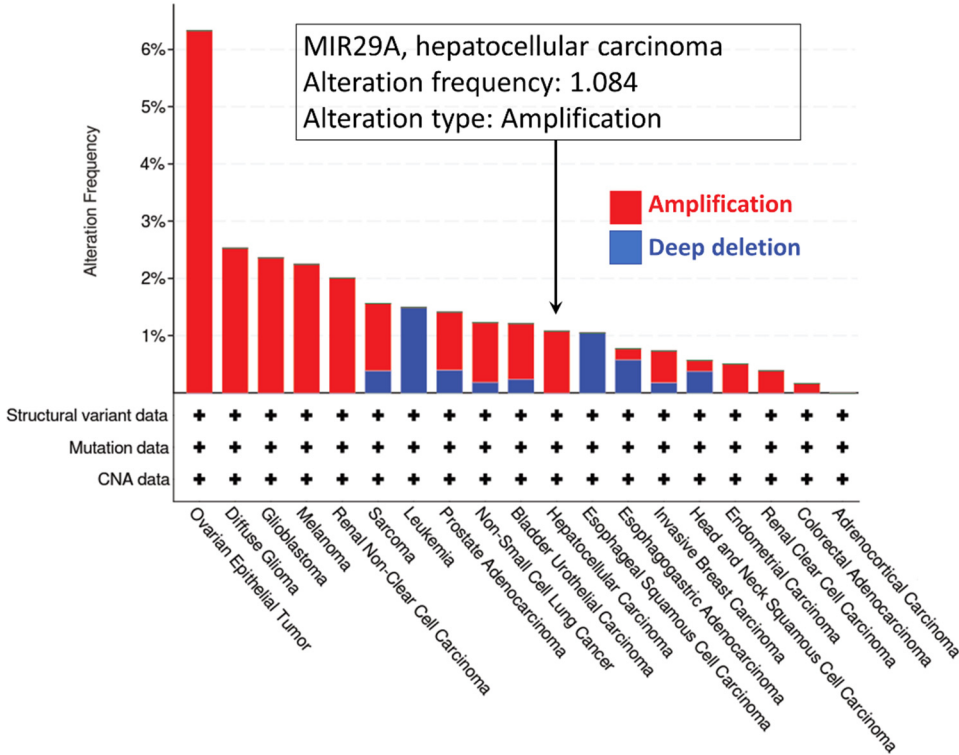

**Figure S1.** The profile of *MIR29A* gene alteration in various cancer types. Note that *MIR29A* in HCC presented 1.084% of amplification without the presence of deletion and mutation.

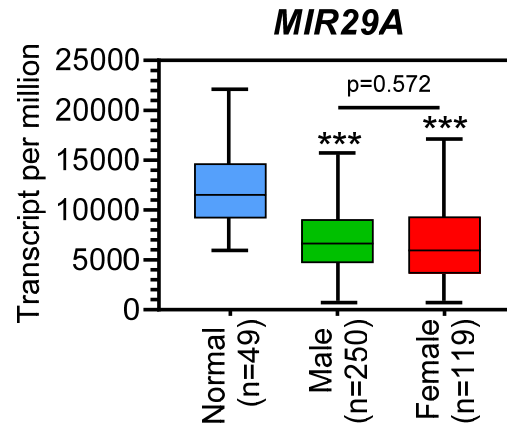

**Figure S2.** The expression level of *MIR29A* in normal tissue and HCC tumor tissue in male and female. Note that there is no potential gender bias acting on *MIR29A* expression in HCC ( $p=0.572$  between male and female HCC tissue). \*\*\* $p<0.001$  as compared to normal group.
