# Supplementary material for: MIR29A Impedes Metastatic Behaviors in Hepatocellular Carcinoma via Targeting LOX, LOXL2, and VEGFA
Source: Int J Mol Sci. 2021 Jun 1;22(11):6001. doi: 10.3390/ijms22116001 (PMC8199573; doi:10.3390/ijms22116001)
Supplement: Supplementary file 1 [file ijms-22-06001-s001.zip › Supplementary File1_OMCD_Absolute data view_MIR29A to MIR16.xlsx]

## Sheet: Raw data
		Normal
LIHC		TCGA-BC-A10Q-11A-11R-A130-13	TCGA-BC-A10R-11A-11R-A130-13	TCGA-BC-A10T-11A-11R-A130-13	TCGA-BC-A10U-11A-11R-A130-13	TCGA-BC-A10W-11A-11R-A130-13	TCGA-BC-A10X-11A-11R-A130-13	TCGA-BC-A10Y-11A-11R-A130-13	TCGA-BC-A10Z-11A-11R-A130-13	TCGA-BC-A110-11A-11R-A130-13	TCGA-BC-A216-11A-11R-A154-13	TCGA-BD-A2L6-11A-21R-A214-13	TCGA-BD-A3EP-11A-12R-A22J-13	TCGA-DD-A113-11A-12R-A130-13	TCGA-DD-A114-11A-12R-A130-13	TCGA-DD-A116-11A-11R-A130-13	TCGA-DD-A116-11A-12R-A25G-13	TCGA-DD-A118-11A-11R-A130-13	TCGA-DD-A119-11A-11R-A130-13	TCGA-DD-A11A-11A-11R-A130-13	TCGA-DD-A11B-11A-11R-A130-13	TCGA-DD-A11C-11A-11R-A130-13	TCGA-DD-A11D-11A-12R-A130-13	TCGA-DD-A1EB-11A-11R-A130-13	TCGA-DD-A1EC-11A-11R-A130-13	TCGA-DD-A1EE-11A-11R-A130-13	TCGA-DD-A1EG-11A-11R-A214-13	TCGA-DD-A1EH-11A-11R-A130-13	TCGA-DD-A1EI-11A-11R-A130-13	TCGA-DD-A1EJ-11A-11R-A154-13	TCGA-DD-A1EL-11A-11R-A154-13	TCGA-DD-A39V-11A-11R-A214-13	TCGA-DD-A39W-11A-11R-A214-13	TCGA-DD-A39X-11A-11R-A214-13	TCGA-DD-A39Z-11A-21R-A214-13	TCGA-DD-A3A1-11A-11R-A214-13	TCGA-DD-A3A2-11A-11R-A214-13	TCGA-DD-A3A3-11A-11R-A22J-13	TCGA-DD-A3A4-11A-11R-A22J-13	TCGA-DD-A3A5-11A-11R-A22J-13	TCGA-DD-A3A6-11A-11R-A22J-13	TCGA-DD-A3A8-11A-11R-A22J-13	TCGA-EP-A12J-11A-11R-A130-13	TCGA-EP-A26S-11A-12R-A16S-13	TCGA-EP-A3RK-11A-11R-A22J-13	TCGA-ES-A2HT-11A-11R-A17X-13	TCGA-FV-A23B-11A-11R-A16S-13	TCGA-FV-A2QR-11A-11R-A214-13	TCGA-FV-A3I0-11A-11R-A22J-13
hsa-mir-29a		10781.8	10656.2	11898	17489.7	7490.42	14633.5	14999.1	22107.5	14427.3	5823.84	21315.7	10953.5	11511.6	17606.5	18823	6557.82	8303.52	8537.97	13001.5	11571.1	11330.2	19305.1	11519.4	14060.2	11039.2	10335	12476.2	8824.3	10622.1	7510.45	8770.7	13964.2	15001.2	14085	19877.6	14758.1	19589	11221.4	7441.5	7443.17	7601.83	11455.5	14916.3	9012.42	9303.87	9814.14	14298.2	9224.99
		Normal
LIHC		TCGA-BC-A10Q-11A-11R-A130-13	TCGA-BC-A10R-11A-11R-A130-13	TCGA-BC-A10T-11A-11R-A130-13	TCGA-BC-A10U-11A-11R-A130-13	TCGA-BC-A10W-11A-11R-A130-13	TCGA-BC-A10X-11A-11R-A130-13	TCGA-BC-A10Y-11A-11R-A130-13	TCGA-BC-A10Z-11A-11R-A130-13	TCGA-BC-A110-11A-11R-A130-13	TCGA-BC-A216-11A-11R-A154-13	TCGA-BD-A2L6-11A-21R-A214-13	TCGA-BD-A3EP-11A-12R-A22J-13	TCGA-DD-A113-11A-12R-A130-13	TCGA-DD-A114-11A-12R-A130-13	TCGA-DD-A116-11A-11R-A130-13	TCGA-DD-A116-11A-12R-A25G-13	TCGA-DD-A118-11A-11R-A130-13	TCGA-DD-A119-11A-11R-A130-13	TCGA-DD-A11A-11A-11R-A130-13	TCGA-DD-A11B-11A-11R-A130-13	TCGA-DD-A11C-11A-11R-A130-13	TCGA-DD-A11D-11A-12R-A130-13	TCGA-DD-A1EB-11A-11R-A130-13	TCGA-DD-A1EC-11A-11R-A130-13	TCGA-DD-A1EE-11A-11R-A130-13	TCGA-DD-A1EG-11A-11R-A214-13	TCGA-DD-A1EH-11A-11R-A130-13	TCGA-DD-A1EI-11A-11R-A130-13	TCGA-DD-A1EJ-11A-11R-A154-13	TCGA-DD-A1EL-11A-11R-A154-13	TCGA-DD-A39V-11A-11R-A214-13	TCGA-DD-A39W-11A-11R-A214-13	TCGA-DD-A39X-11A-11R-A214-13	TCGA-DD-A39Z-11A-21R-A214-13	TCGA-DD-A3A1-11A-11R-A214-13	TCGA-DD-A3A2-11A-11R-A214-13	TCGA-DD-A3A3-11A-11R-A22J-13	TCGA-DD-A3A4-11A-11R-A22J-13	TCGA-DD-A3A5-11A-11R-A22J-13	TCGA-DD-A3A6-11A-11R-A22J-13	TCGA-DD-A3A8-11A-11R-A22J-13	TCGA-EP-A12J-11A-11R-A130-13	TCGA-EP-A26S-11A-12R-A16S-13	TCGA-EP-A3RK-11A-11R-A22J-13	TCGA-ES-A2HT-11A-11R-A17X-13	TCGA-FV-A23B-11A-11R-A16S-13	TCGA-FV-A2QR-11A-11R-A214-13	TCGA-FV-A3I0-11A-11R-A22J-13
hsa-mir-16-1		693.06	657.88	676.96	776.45	766.06	896.19	640.75	973.12	830.57	523.67	1002.85	376.14	656.16	1048.91	1063.84	384.79	603.75	519.77	857.04	594.45	779.1	1024.08	649.11	730.5	537.03	388.4	672.32	756.89	573.03	567.56	412.25	574.61	396.63	380.26	521.48	352.65	712.28	440.87	284.24	376.79	344.61	754.43	613.33	360.27	333.8	622.35	542.53	380.63
[truncated: 378 more columns]
